# Supplementary material for: Rapid Isothermal detection and Quantification of Total Salmonella in Poultry Using the HyperKit Point-of-Use diagnostic test
Source: Research Square preprint supplement (doi:10.21203/rs.3.rs-7935441/v1), 2025-11-20
Supplement: Supplementary file 1 [file 66340debe209f152d1589878.docx]

**Supplemental Information 1. HyperKit Total *Salmonella* enable the rapid detection of *Salmonella* using multiple thermocycler with a fluorescent reader.**

**Highlights**

- The HyperKit Total *Salmonella* demonstrated excellent compatibility across three distinct fluorescence detection platforms: Aladdin Analyzer (Hypercell), Mini 8-Hole Isothermal Fluorescence PCR (Laboao), and CFX96 Touch Real-Time PCR Detection System (Bio-Rad).
- Consistent fluorescence signal profiles and time-to-result performance were observed across all platforms, with no false positives or false negatives recorded. This confirms the flexibility and reliability of the HyperKit Total *Salmonella* across a range of operational settings.

**Materials & Methods**

**Fluorescent Detection Platforms Evaluated:**

- **Aladdin Analyzer (Hypercell)**: A compact, portable, and cost-effective fluorescence reader optimized for Hypercell isothermal chemistry. Delivers rapid, high-sensitivity detection in less than 60 minutes with minimal user input.
- **Mini 8-Hole Isothermal Fluorescence PCR (Laboao)**: A low-cost benchtop instrument designed for field or small-lab applications. Supports isothermal amplification and real-time fluorescence detection for up to 8 samples using FAM-compatible probes.
- **CFX96 Touch Real-Time PCR Detection System (Bio-Rad)**: A high-throughput, research-grade qPCR system widely used in academic and industrial labs. Compatible with HyperKit using FAM channels and standard 96-well plate formats.

**Experimental Design:**

- **Pathogen Target:** Salmonella Typhimurium
- **Positive samples (n=5 per unit):** HyperMix tubes pre-filled with lyophilized isothermal master mix, 50 µL of proprietary Hypercell buffer, and approximately 500 Salmonella cells.
- **Negative controls (n=5 per unit):** HyperMix tubes pre-filled with lyophilized isothermal master mix and 50 µL of proprietary Hypercell buffer.
- **Incubation:** All tubes were run at 65°C for 60 minutes. Fluorescence (excitation 495 nm) was recorded every 30 seconds.
- **Total reactions:** 30 reactions used in this study (15 positive, 15 negative)

**Results**

- Salmonella was consistently detected across all three devices with an average time to detection of 13 ± 2.2 minutes.
- No fluorescence signal was detected in any of the negative control reactions over the 60-minute run time.
- No false positives or false negatives were recorded, confirming the high specificity and sensitivity of the HyperKit detection chemistry regardless of the fluorescence reader used.

**Table. Detection speed and accuracy of HyperKit Total *Salmonella*** **across three fluorescent units**

| Testing groups | Fluorescent units | | |
| --- | --- | --- | --- |
| **CFX96 Touch**  **(Bio-Rad; n=5 reps per group)** | **Aladdin Analyzer (Hypercell; n=5 reps per group)** | **Mini 8-Hole PCR (Laboao; n=5 reps per group)** |
| Spiked (500 cells) | 13 ±2.2 | 13 ±1.3 | 13 ±1.8 |
| Not spiked (DNA-free) | ND | ND | ND |

**ND:** No fluorescent signal detected within 60 minutes at 65°C. Numbers indicate detection speed (time to result in minutes when the fluorescence signal reach 1000 relative fluorescent unit [RFU]).

**Figure.** Detection profiles across three fluorescence platforms*.* Head-to-head comparison of HyperKit Total *Salmonella* on three commercial fluorescence readers. All reactions were spiked with ~500 CFU of Salmonella (positive). N=5 reps per unit.

**Supplemental Information 2. Differences in *Salmonella* concentrations between HyperKit Total *Salmonella* and the reference microbiology method.**

**Figure.** The boxplot displays the differences in *Salmonella* concentration data between HyperKit Total *Salmonella* and the reference microbiology method. The boxplot is separated by spiking groups (A-K), proportionally organized based on *Salmonella* concentration in chicken primal samples (**Table 1**). Black dots indicate chicken primal samples (n=57). Red dotted line indicates the level where no difference in *Salmonella* concentration was observed between the two methods.

**Supplemental Information 3. Repeatability of HyperKit Total *Salmonella* and the reference microbiology method for the detection of Salmonella in chicken primal samples.**

**Figure.** The boxplot displays the repeatability observed between HyperKit Total *Salmonella* and the reference microbiology method. The repeatability of each method was measured by processing several times (n=2-4 times) the same chicken primal samples spiked with a known concentration of *Salmonella*. Black dots indicate the variability in Salmonella concentration obtained when processing the same chicken primal samples compared to the average of the concentrations obtained with the same chicken primal sample (n=44 replicates total).

**Supplemental Information 4. Robustness of HyperKit Total *Salmonella*.**

**Table 1. Detection of *Salmonella* using HyperMix with different final volumes in reaction tube**

| Final volume in HyperMix tube (ul) | 20 | 30 | 40 | 50 | 60 | 70 | 80 | 90 | 100 | 125 | 150 |
| --- | --- | --- | --- | --- | --- | --- | --- | --- | --- | --- | --- |
| Time to results (min) | >60 | 25 ±10 | 11 ±2 | 10 ±2 | 12 ±4 | 16 ±5 | 22 ±10 | 25 ±11 | 27 ±16 | 39 ±14 | >60 |

The color of the cells is associated to the time to results data (average and standard deviation; green: no detection speed delays; red: orange: substantial detection speed delays; red: no detection of *Salmonella*). All reaction were spiked with 1000 CFU and incubated at 65oC for 60 min. *Salmonella* detection was assess based on the detection of fluorescent signal (> 1000 relative fluorescent unit [RFU]) at 495 nm.

*

**Figure 1.** Impact of “air pump” on the final volume extract using the HyperPen. The Box plot is divided based on the number of air pump conducted during the HyperKit SOP. N= 5 reps per group. Blue line: smooth curve. A black dot indicates a recorded volume. Star indicates significant (P<0.01) lower extracted volume between 0 “air pump” group and the 2-10 “air pump” groups.
